# Supplementary material for: Reductive functionalization of carbon dioxide to methyl acrylate at zerovalent tungsten
Source: Royal Society of Chemistry journal article supplement (doi:10.1039/c2dt31032e), 2012-01-01
Supplement: c2dt31032e.pdf [file c2dt31032e.pdf]

## Reductive Functionalization of Carbon Dioxide to Methyl Acrylate at Zerovalent Tungsten

Justin M. Wolfe and Wesley H. Bernskoetter\*

*Department of Chemistry, Brown University, Providence, RI 02912*

e-mail: wb36@brown.edu

### Supplementary Information:

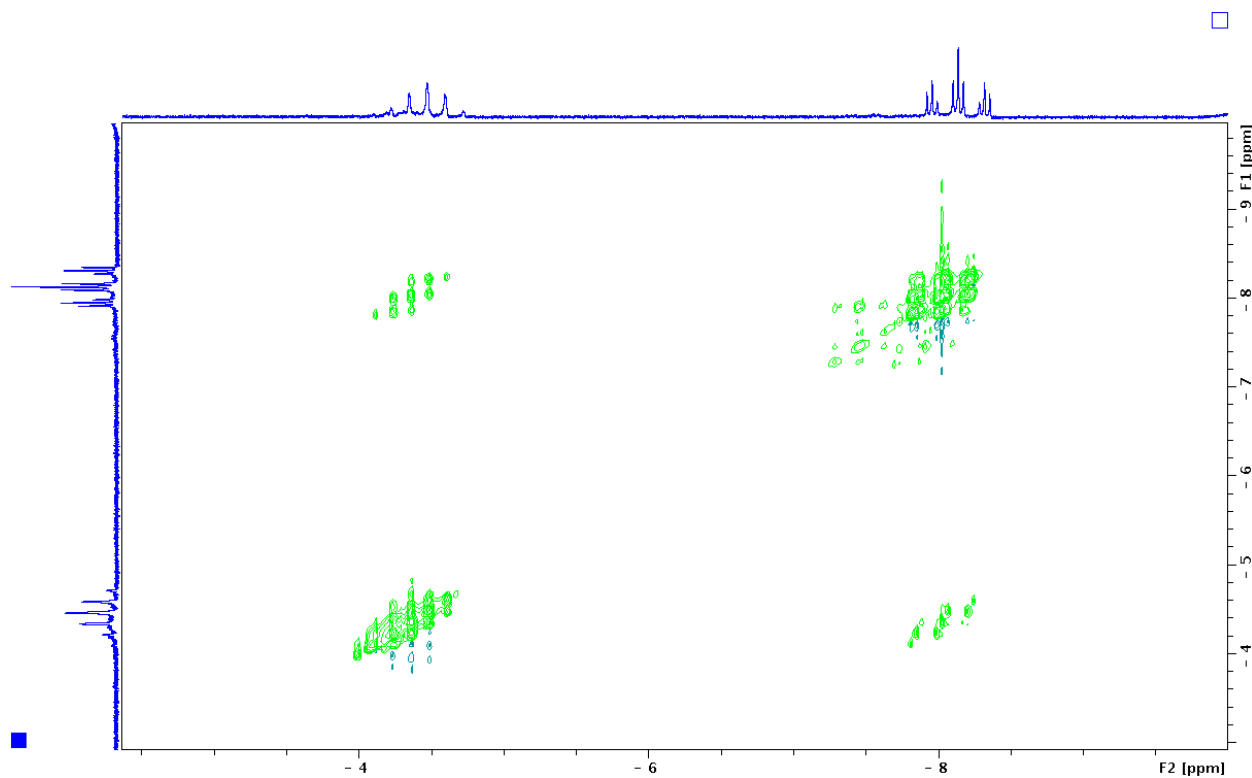

**Fig. S1** 2D NOESY NMR spectrum of the **2-C<sub>3</sub>H<sub>3</sub>O<sub>2</sub>** isomers in benzene-*d*<sub>6</sub> at 27 °C with 350 ms mixing time.

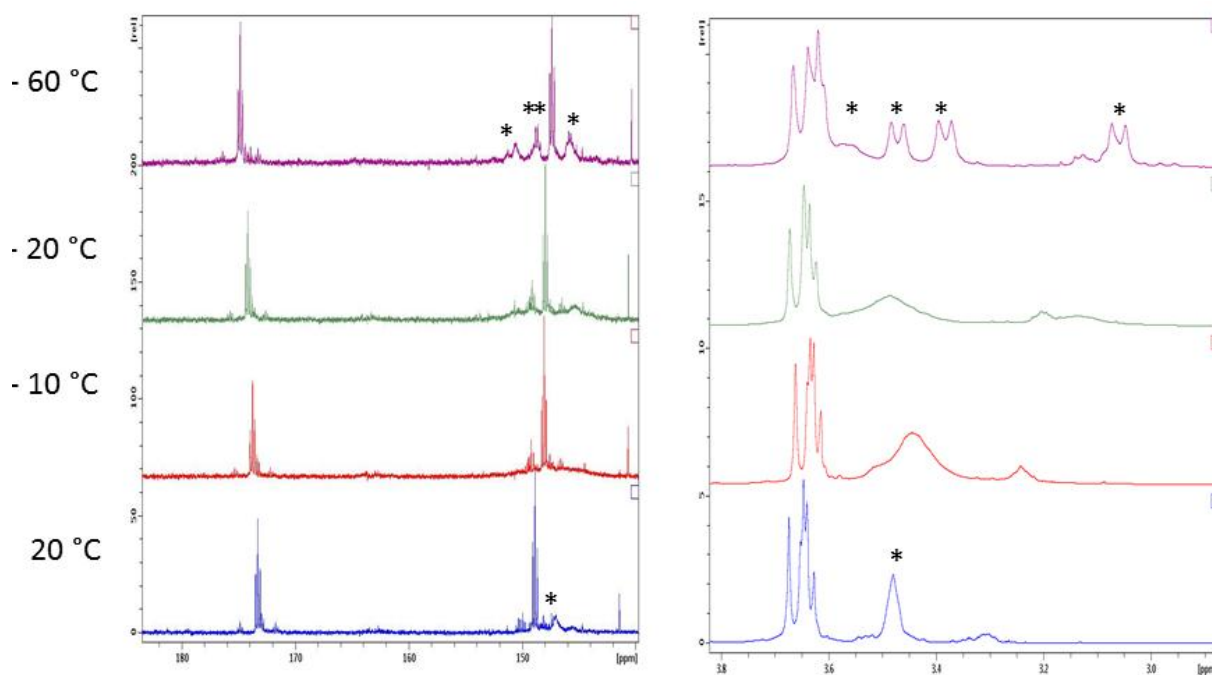

**Fig. S2** Partial variable temperature  $^1\text{H}$  (right) and  $^{31}\text{P}$  (left) NMR spectra in toluene- $d_8$  depicting the signals derived from W-P(OMe) $_3$ . The \* denotes signals attributed to  $\kappa^3\text{-2-C}_3\text{H}_3\text{O}_2$  isomer.

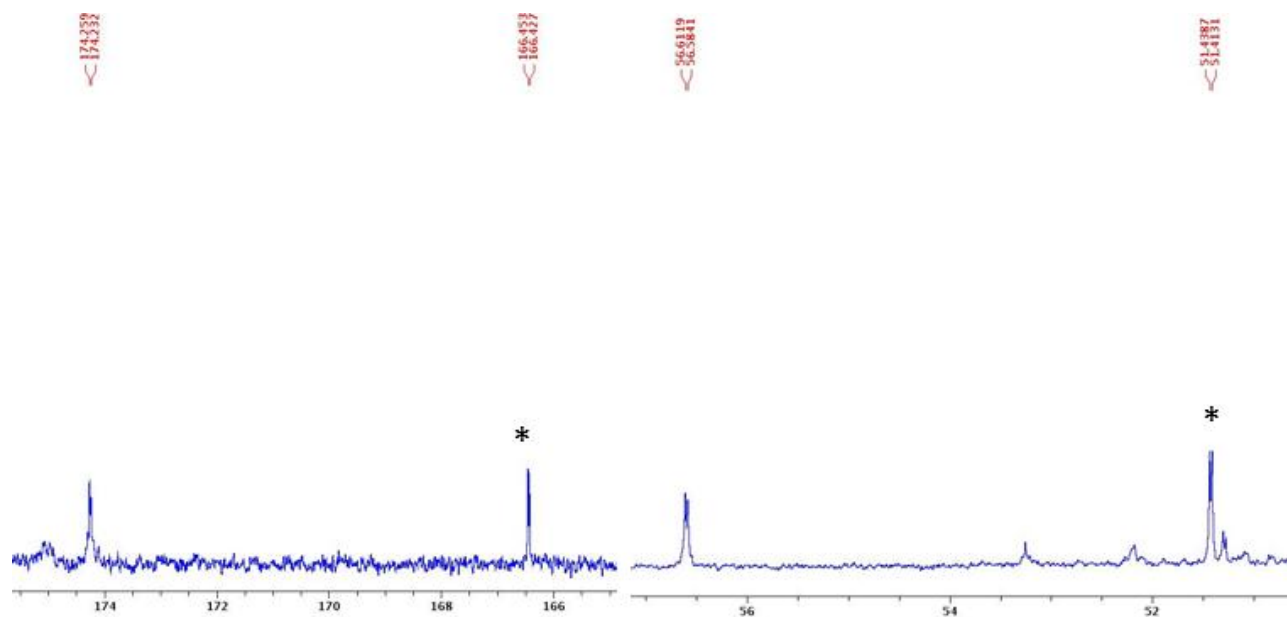

**Fig. S3** Partial  $^{13}\text{C}$  NMR spectra of the addition of  $^{13}\text{CH}_3\text{I}$  to  $^{13}\text{CO}_2$  labeled  $2\text{-C}_3\text{H}_3\text{O}_2$  in benzene- $d_6$  at ambient temperature. The \* denotes signals for free methyl acrylate.
